# Supplementary material
Source: publisher figshare collection journal article supplement (https://wiley.figshare.com/articles/dataset/_/3529967)
Supplement: Supplementary file 1 [file 1]

The parsim program consists of the following source files:

```
critter.cpp and .h
distrib.cpp and .h
random.cpp and .h
parsim.cpp
```

Other files of interest:

|       |                      |                                        |
|-------|----------------------|----------------------------------------|
|       | c.bat                | Windows BAT file for compiling with MS |
| C++   | c                    | bash script for compiling with g++ on  |
| Linux |                      |                                        |
|       | parsim.exe           | Windows executable                     |
|       | exampleinputfile.txt | Example parameter file                 |
|       | parsim.out           | Output from exampleinputfile.txt       |

To compile on Windows type "c" at the command prompt to run c.bat.

To compile on Linux type "./c" at the command prompt to run the c script.

To execute the program on the example file under Windows:

```
parsim exampleinputfile.txt >out.txt
```

The files out.txt and parsim.out should yield identical results.

To execute the program on the example file under Linux:

```
./parsim exampleinputfile.txt >out.txt
```

The files out.txt and parsim.out are equivalent, but lines in out.txt are terminated by a single LF character, while the file parsim.out has lines terminated by a CRLF combination. Various utilities exist on both Windows and Linux to convert back and forth.

<End>
